# Supplementary material for: Gasdermin D mediates the pathogenesis of neonatal-onset multisystem inflammatory disease in mice
Source: PubMed Central journal article supplement (PMC6235378; doi:10.1371/journal.pbio.3000047), 2018-11-02

**A**

WT

NOMID

NOMID;*Gsdmd*<sup>-/-</sup>*Gsdmd*<sup>-/-</sup>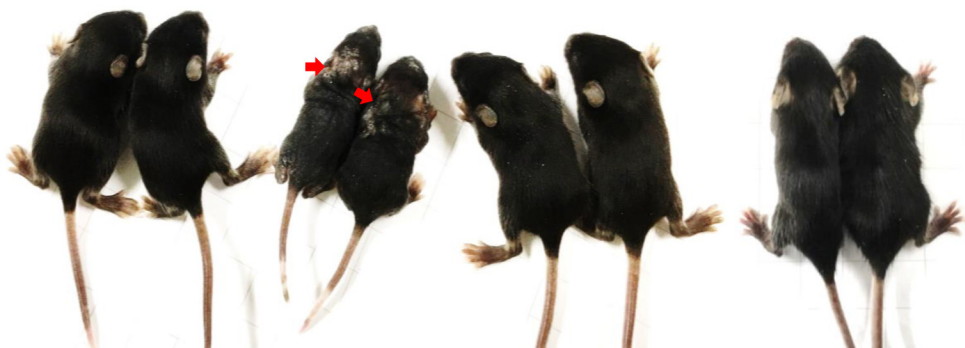**B**

WT

NOMID

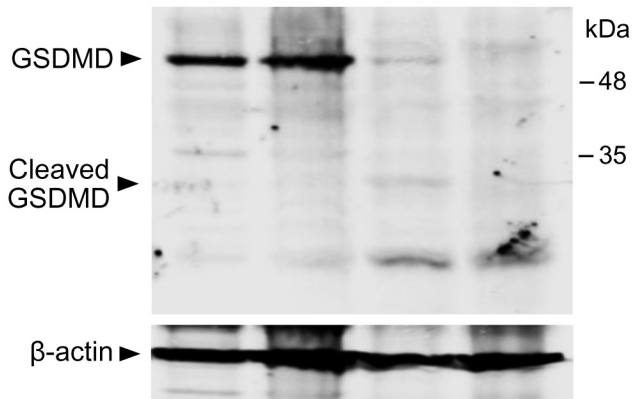**C**

WT

NOMID

NOMID;  
*Gsdmd*<sup>-/-</sup>*Gsdmd*<sup>-/-</sup>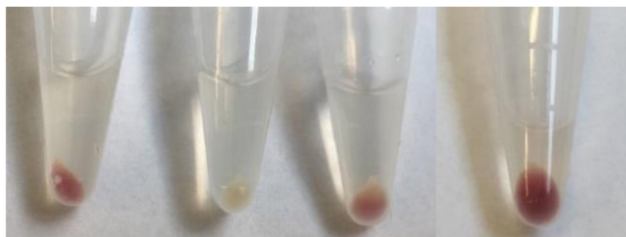

Supplement: pbio.3000047.s001.pdf [file pbio.3000047.s001.pdf]
